# Supplementary material for: Antioxidant Effects of PS5, a Peptidomimetic of Suppressor of Cytokine Signaling 1, in Experimental Atherosclerosis
Source: MDPI journal article supplement (doi:10.3390/antiox9080754), 2020-08-14
Supplement: s1 [file s1]

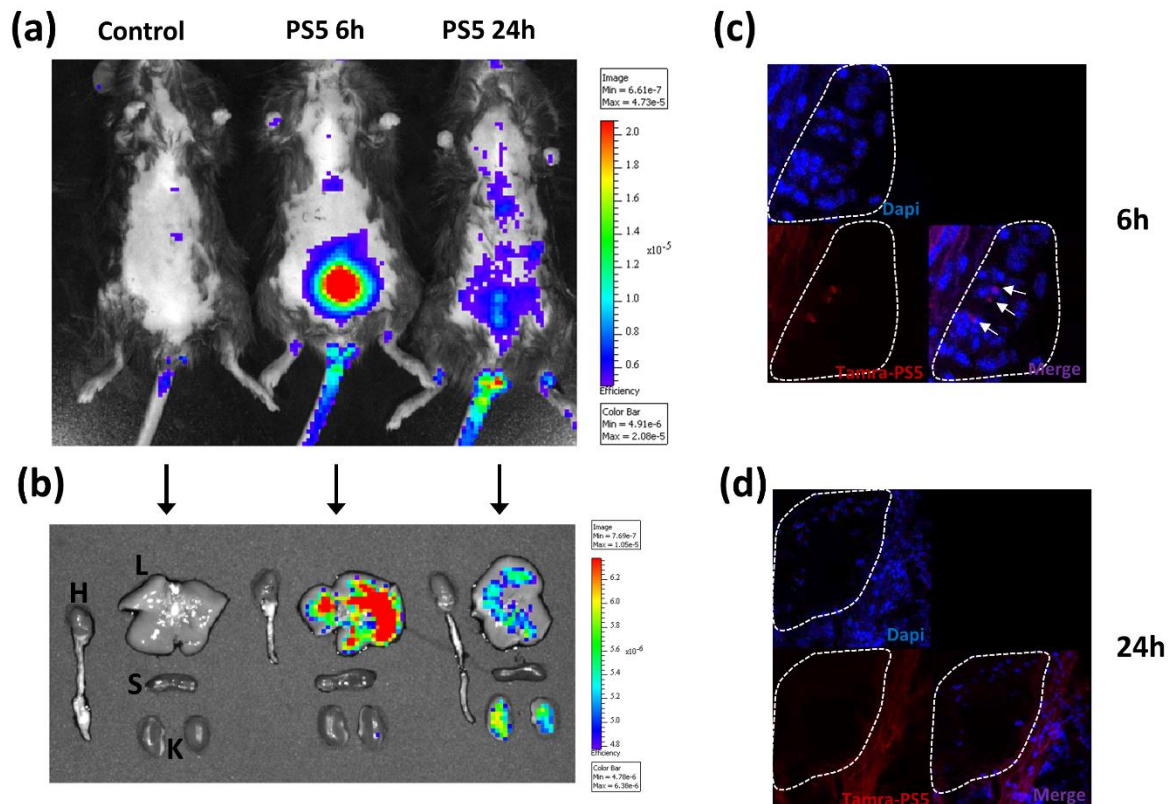

**Figure S1. Biodistribution of PS5 peptide in ApoE KO mice.** (a) *In vivo* and (b) *ex vivo* images showing tissue biodistribution of TAMRA-labeled PS5 peptide at 6 and 24h post-injection. Abbreviations: H, heart; L, liver; S, spleen; K, Kidney. Microscopic distribution of PS5 in mouse *atherosclerotic plaque* at (c) 6h and (d) 24h post-injection. Red, TAMRA-PS5; blue, DAPI. *Dashed line: plaque area, arrows: positive cells*

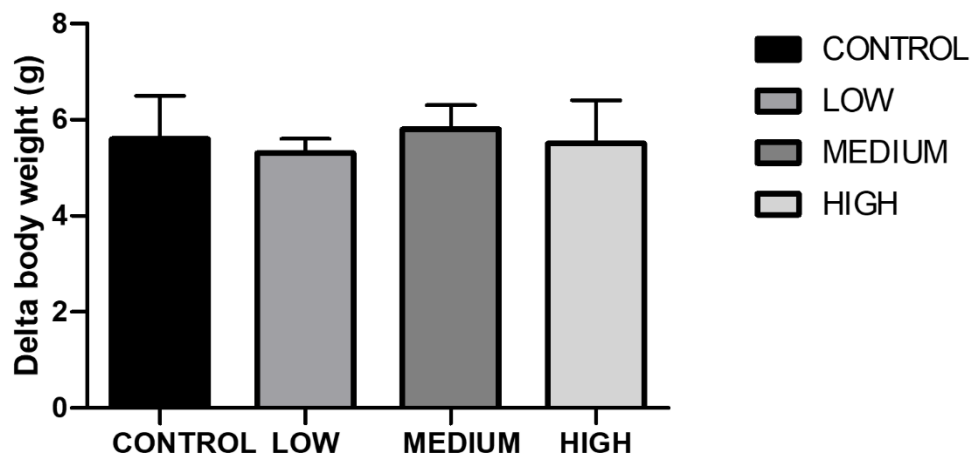

**Figure S2.** Averaged values of differences of body weights among mice groups evaluated weekly for 8 weeks
